# Supplementary material
Source: publisher figshare collection journal article supplement (https://asha.figshare.com/articles/dataset/_/21569040)
Supplement: Supplementary file 1 [file 1]

**Supplemental Material S10.** Post-Hoc Comparisons for Differences Between Open Science Practices in Perceived Benefit to Daily Life

| Comparison                          | Estimate | SE    | Z-Ratio | <i>p</i> |
|-------------------------------------|----------|-------|---------|----------|
| Open Access vs. Open Data           | -0.423   | 0.170 | -2.487  | .062     |
| Open Access vs. Pre-Registration    | 0.092    | 0.166 | 0.553   | .946     |
| Open Access vs. Self-Archiving      | -0.794   | 0.174 | -4.562  | < .001   |
| Open Data vs. Pre-Registration      | 0.514    | 0.165 | 3.116   | .010     |
| Open Data vs. Self-Archiving        | -0.371   | 0.171 | -2.169  | .132     |
| Pre-Registration vs. Self-Archiving | -0.886   | 0.169 | -5.228  | < .001   |

SE = standard error
