# Supplementary material
Source: publisher figshare collection journal article supplement (https://asha.figshare.com/articles/dataset/_/21569040)
Supplement: Supplementary file 2 [file 1]

**Supplemental Material S11.** Post-Hoc Comparisons for Differences Between Open Science Practices in Perceived Benefit to One's Research Field

| Comparison                          | Estimate | <i>SE</i> | Z-Ratio | <i>p</i> |
|-------------------------------------|----------|-----------|---------|----------|
| Open Access vs. Open Data           | -0.39    | 0.17      | -2.30   | .10      |
| Open Access vs. Pre-Registration    | 0.17     | 0.17      | 1.04    | .73      |
| Open Access vs. Self-Archiving      | -0.69    | 0.17      | -3.98   | < .001   |
| Open Data vs. Pre-Registration      | 0.57     | 0.17      | 3.40    | < .001   |
| Open Data vs. Self-Archiving        | -0.30    | 0.17      | -1.71   | .32      |
| Pre-Registration vs. Self-Archiving | -0.86    | 0.17      | -5.10   | < .001   |

*SE* = standard error
