# Supplementary material
Source: publisher figshare collection journal article supplement (https://asha.figshare.com/articles/dataset/_/21569040)
Supplement: Supplementary file 3 [file 1]

**Supplemental Material S9.** Post-Hoc Comparisons for Differences Between Open Science Practices in Perceived Knowledge

| Comparison                          | Estimate | <i>SE</i> | Z-Ratio | <i>p</i> |
|-------------------------------------|----------|-----------|---------|----------|
| Open Access vs. Open Data           | -0.184   | 0.174     | -1.061  | .713     |
| Open Access vs. Pre-Registration    | 0.572    | 0.173     | 3.310   | .005     |
| Open Access vs. Self-Archiving      | 0.053    | 0.177     | 0.296   | .991     |
| Open Data vs. Pre-Registration      | 0.756    | 0.168     | 4.488   | < .001   |
| Open Data vs. Self-Archiving        | 0.237    | 0.172     | 1.176   | .515     |
| Pre-Registration vs. Self-Archiving | -0.520   | 0.171     | -3.032  | .013     |

*SE* = standard error
