# Supplementary material
Source: publisher figshare collection journal article supplement (https://asha.figshare.com/articles/dataset/_/21569040)

### Supplemental Material S3. Self-Archiving: Knowledge, Barriers, and Perceived Benefit by Research Position

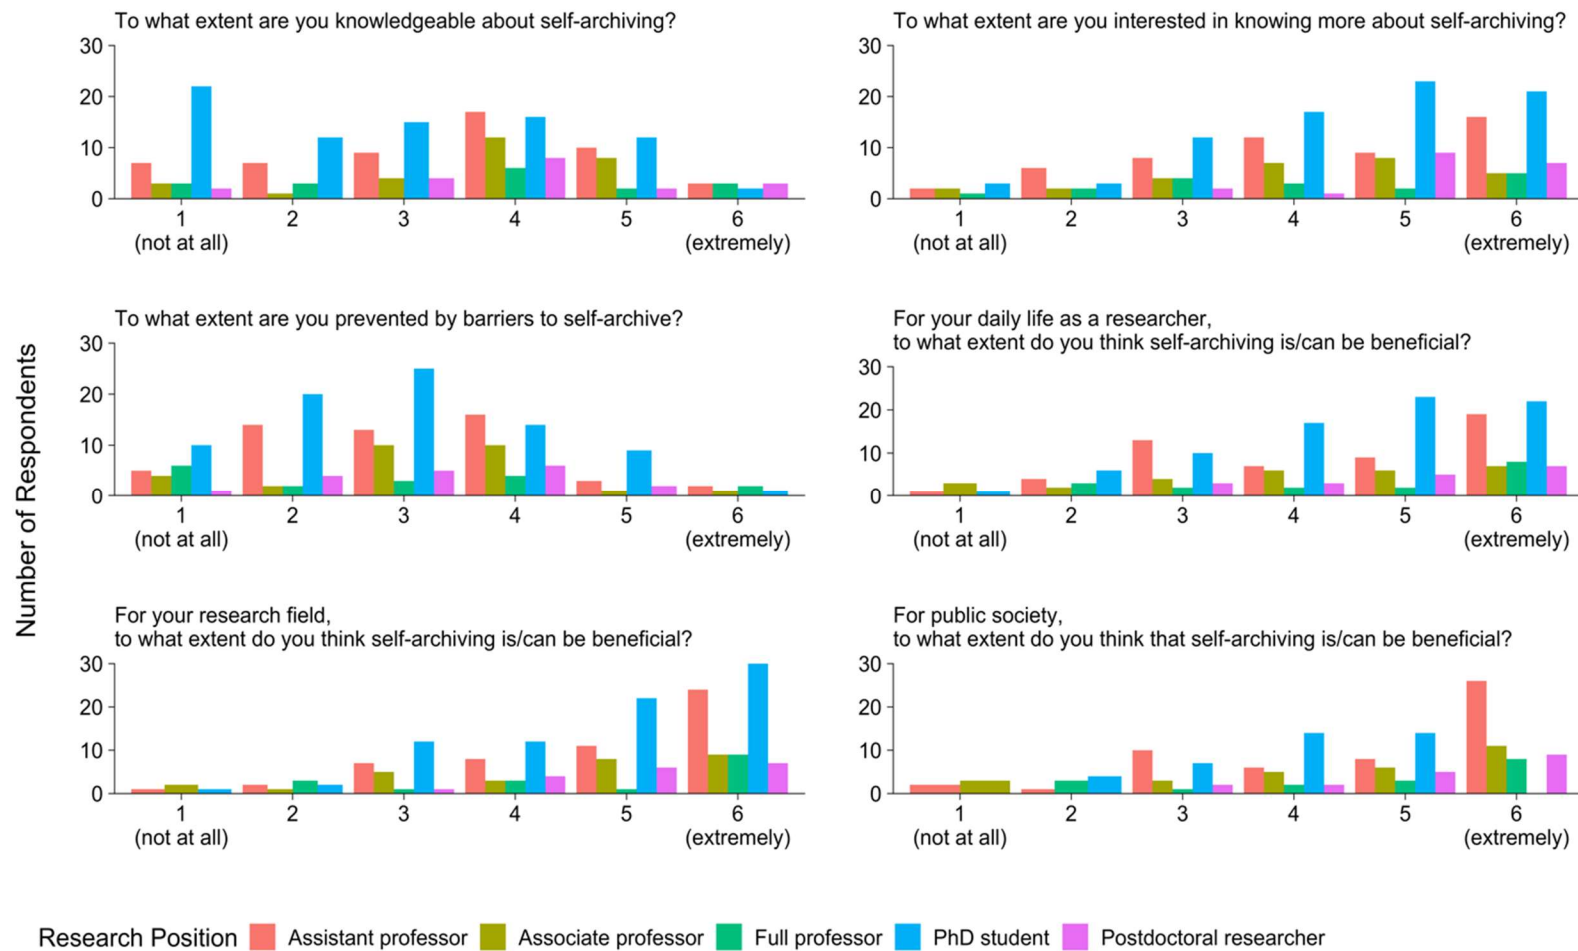

Supplement: Supplementary file 6 [file 1]
