# Supplementary material
Source: publisher figshare collection journal article supplement (https://asha.figshare.com/articles/dataset/_/21569040)
Supplement: Supplementary file 7 [file 1]

**Supplemental Material S12.** Post-Hoc Comparisons for Differences Between Open Science Practices in Perceived Benefit to Public Society

| Comparison                          | Estimate | SE    | Z-Ratio | <i>p</i> |
|-------------------------------------|----------|-------|---------|----------|
| Open Access vs. Open Data           | 0.224    | 0.171 | 1.308   | .558     |
| Open Access vs. Pre-Registration    | 0.377    | 0.166 | 2.267   | .106     |
| Open Access vs. Self-Archiving      | -0.528   | 0.175 | -3.017  | .014     |
| Open Data vs. Pre-Registration      | 0.154    | 0.165 | 0.932   | .787     |
| Open Data vs. Self-Archiving        | -0.751   | 0.174 | -4.309  | < .001   |
| Pre-Registration vs. Self-Archiving | -0.905   | 0.170 | -5.317  | < .001   |

SE = standard error
