# Supplementary material
Source: publisher figshare collection journal article supplement (https://asha.figshare.com/articles/dataset/_/21569040)
Supplement: Supplementary file 8 [file 1]

**Supplemental Material S5.** Post-Hoc Comparisons for Carnegie Classifications and Knowledge in Gold Open Access

| Comparison     | Estimate | <i>SE</i> | Z-Ratio | <i>p</i> |
|----------------|----------|-----------|---------|----------|
| D/PU vs. Other | 0.085    | 0.576     | 0.147   | .999     |
| D/PU vs. R1    | -0.810   | 0.385     | -2.103  | .152     |
| D/PU vs. R2    | -0.540   | 0.441     | -1.223  | .612     |
| Other vs. R1   | -0.895   | 0.508     | -1.762  | .292     |
| Other vs. R2   | -0.625   | 0.537     | -1.163  | .650     |
| R1 vs. R2      | 0.270    | 0.327     | 0.826   | .842     |

D/PU: Doctoral/Professional University; *SE* = standard error
