# Supplementary material
Source: publisher figshare collection journal article supplement (https://asha.figshare.com/articles/dataset/_/21569040)
Supplement: Supplementary file 10 [file 1]

**Supplemental Material S8. Post-Hoc Comparisons for Research Position and Knowledge in Sharing Open Data**

| Comparison                                       | Estimate | SE   | Z-Ratio | <i>p</i> |
|--------------------------------------------------|----------|------|---------|----------|
| Assistant Professor vs. Associate Professor      | -2.09    | 1.51 | -1.38   | .86      |
| Assistant Professor vs. Clinician Researcher     | -1.80    | 1.57 | -1.15   | .95      |
| Assistant Professor vs. Full Professor           | -2.31    | 1.63 | -1.42   | .85      |
| Assistant Professor vs. Other                    | -2.32    | 1.72 | -1.35   | .88      |
| Assistant Professor vs. PhD Student              | -1.87    | 1.49 | -1.25   | .92      |
| Assistant Professor vs. Postdoctoral Researcher  | -2.40    | 1.54 | -1.55   | .78      |
| Assistant Professor vs. Research Scientist       | -3.07    | 1.60 | -1.91   | .54      |
| Associate Professor vs. Clinician Researcher     | 0.29     | 0.49 | 0.60    | 1.00     |
| Associate Professor vs. Full Professor           | -0.22    | 0.72 | -0.30   | 1.00     |
| Associate Professor vs. Other                    | -0.22    | 0.79 | -0.28   | 1.00     |
| Associate Professor vs. PhD Student              | 0.23     | 0.36 | 0.63    | 1.00     |
| Associate Professor vs. Postdoctoral Researcher  | -0.31    | 0.48 | -0.63   | 1.00     |
| Associate Professor vs. Research Scientist       | -0.97    | 0.66 | -1.48   | .82      |
| Clinician researcher vs. Full Professor          | -0.51    | 0.81 | -0.63   | 1.00     |
| Clinician researcher vs. Other                   | -0.51    | 0.71 | -0.73   | 1.00     |
| Clinician researcher vs. PhD Student             | -0.06    | 0.54 | -0.12   | 1.00     |
| Clinician researcher vs. Postdoctoral Researcher | -0.60    | 0.59 | -1.01   | .97      |

|                                                 |       |      |       |      |
|-------------------------------------------------|-------|------|-------|------|
| Clinician researcher vs. Research Scientist     | -1.27 | 0.74 | -1.70 | .69  |
| Full Professor vs. Other                        | 0.00  | 1.03 | 0.00  | 1.00 |
| Full Professor vs. PhD Student                  | 0.45  | 0.71 | 0.63  | 1.00 |
| Full Professor vs. Postdoctoral Researcher      | -0.09 | 0.78 | -0.11 | 1.00 |
| Full Professor vs. Research Scientist           | -0.75 | 0.90 | -0.84 | .99  |
| Other vs. PhD Student                           | 0.45  | 0.88 | 0.51  | 1.00 |
| Other vs. Postdoctoral Researcher               | -0.08 | 0.87 | -0.10 | 1.00 |
| Other vs. Research Scientist                    | -0.75 | 0.97 | -0.77 | .99  |
| PhD Student vs. Postdoctoral Researcher         | -0.53 | 0.47 | -1.13 | .95  |
| PhD Student vs. Research Scientist              | -1.20 | 0.64 | -1.87 | .57  |
| Post-doctoral researcher vs. Research Scientist | -0.67 | 0.72 | -0.92 | .98  |

---

D/PU: Doctoral/Professional University; *SE* = standard error
