# Supplementary material
Source: publisher figshare collection journal article supplement (https://asha.figshare.com/articles/dataset/_/21569040)
Supplement: Supplementary file 11 [file 1]

**Supplemental Material S7.** Post-Hoc Comparisons for Carnegie Classifications and Knowledge in Sharing Open Data

| Comparison     | Estimate | <i>SE</i> | Z-Ratio | <i>p</i> |
|----------------|----------|-----------|---------|----------|
| D/PU vs. Other | -0.68    | 0.66      | -1.03   | .73      |
| D/PU vs. R1    | -1.22    | 0.4       | -3.02   | .01      |
| D/PU vs. R2    | -1.05    | 0.47      | -2.25   | .11      |
| Other vs. R1   | -0.54    | 0.6       | -0.9    | .8       |
| Other vs. R2   | -0.37    | 0.63      | -0.58   | .94      |
| R1 vs. R2      | 0.17     | 0.34      | 0.5     | .96      |

D/PU: Doctoral/Professional University; *SE* = standard error
